# Supplementary material for: The physics and chemistry of silica-in-silicates nanocomposite hydrogels and their phycocompatibility
Source: Royal Society of Chemistry journal article supplement (doi:10.1039/c7tb00341b), 2017-01-01

## **Electronic Supporting Information**

### **The physics and chemistry of silica-in-silicates nanocomposite hydrogels and their phycocompatibility**

Nada Ben Ahmed, Olivier Ronsin, Ludovic Mouton, Clémence Sicard, Claude Yéprémian, Tristan Baumberger, Roberta Brayner, and Thibaud Coradin

**ESI-1 :** Experimental details on cell culture

**ESI-2 :** Evolution of gelation time and optical density at 400 nm with total silica concentration at pH 7, 6 and 5.

**ESI-3:** TEM images of gels at various pH, silicates and Ludox concentrations.

**ESI-4** Macroscopic observations of cell suspension at various pHs

**ESI-5** TEM images of cells encapsulated at various pH and silicate concentration

## ESI-1 : Experimental details on cell culture

Bold Basal (BB) medium for *A. flos-aquae* and *C. vulgaris* culture and mineral (M) medium for *E. gracilis* culture were prepared according to the literature.<sup>1</sup> All culture media are sterilized by autoclaving (130° C, 20 min, 220 kPa) before use. The micro-algae kept in erlenmeyer flasks, are placed in growth chamber conditioned to  $(20.0 \pm 1.0)$  °C and is manually shaken once a day at least. The luminosity is adjusted to the optimal intensity for each strain through neon lights ( $30\text{-}60 \mu\text{mol m}^{-2} \text{s}^{-1}$  photosynthetic photon flux (PPF) for cyanobacteria,  $40\text{-}70 \mu\text{mol m}^{-2} \text{s}^{-1}$  for green micro-algae). Algae were maintained in nycthemeral cycles of 16 hours of illumination and 8 hours of darkness. Corresponding growth curves are provided below

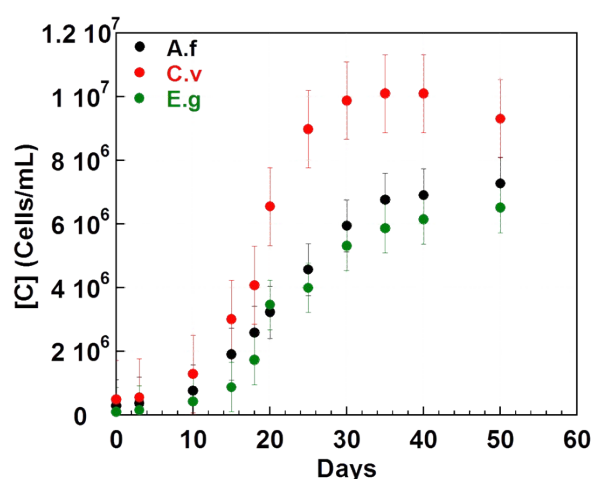

<sup>1</sup>Handbook of Phycological methods. Culture methods and growth measurements. Ed. J. Stein Cambridge University Press. 1973

**ESI-2 :** Evolution of gelation time and optical density at 400 nm with total silica concentration at pH 7, 6 and 5: (a-c) each color line is at fixed silicate (S) concentration; (d-f) each color line is at fixed Ludox (L) concentration. Dashed lines represent composition range where similar gel time or optical density can be obtained for different silicate or Ludox concentrations

### Gel time

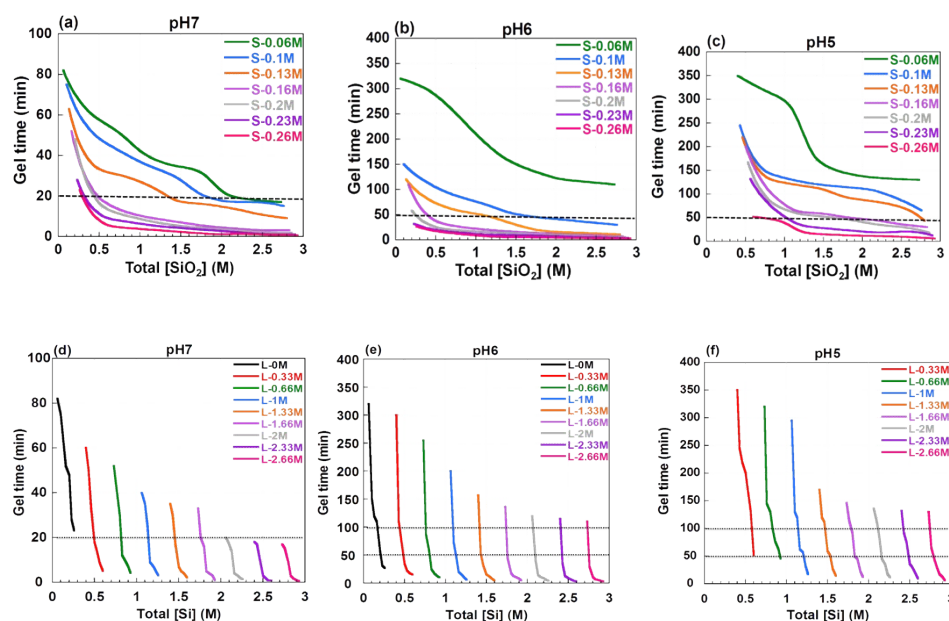

### Optical density

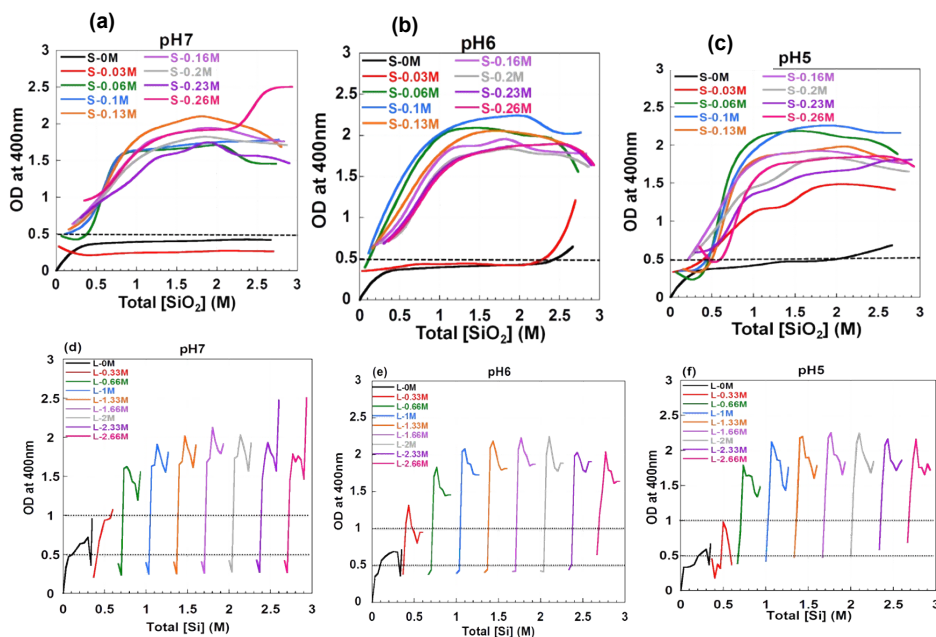

**ESI-3** TEM images of gels (a-c) at fixed silicate and Ludox and variable pH, (d-f) at fixed Ludox and pH and variable silicate, (g-i) at fixed silicate and pH and variable Ludox (scale bar = 1  $\mu\text{m}$ ). S = silicate concentration (in M); L = Ludox concentration (in M).

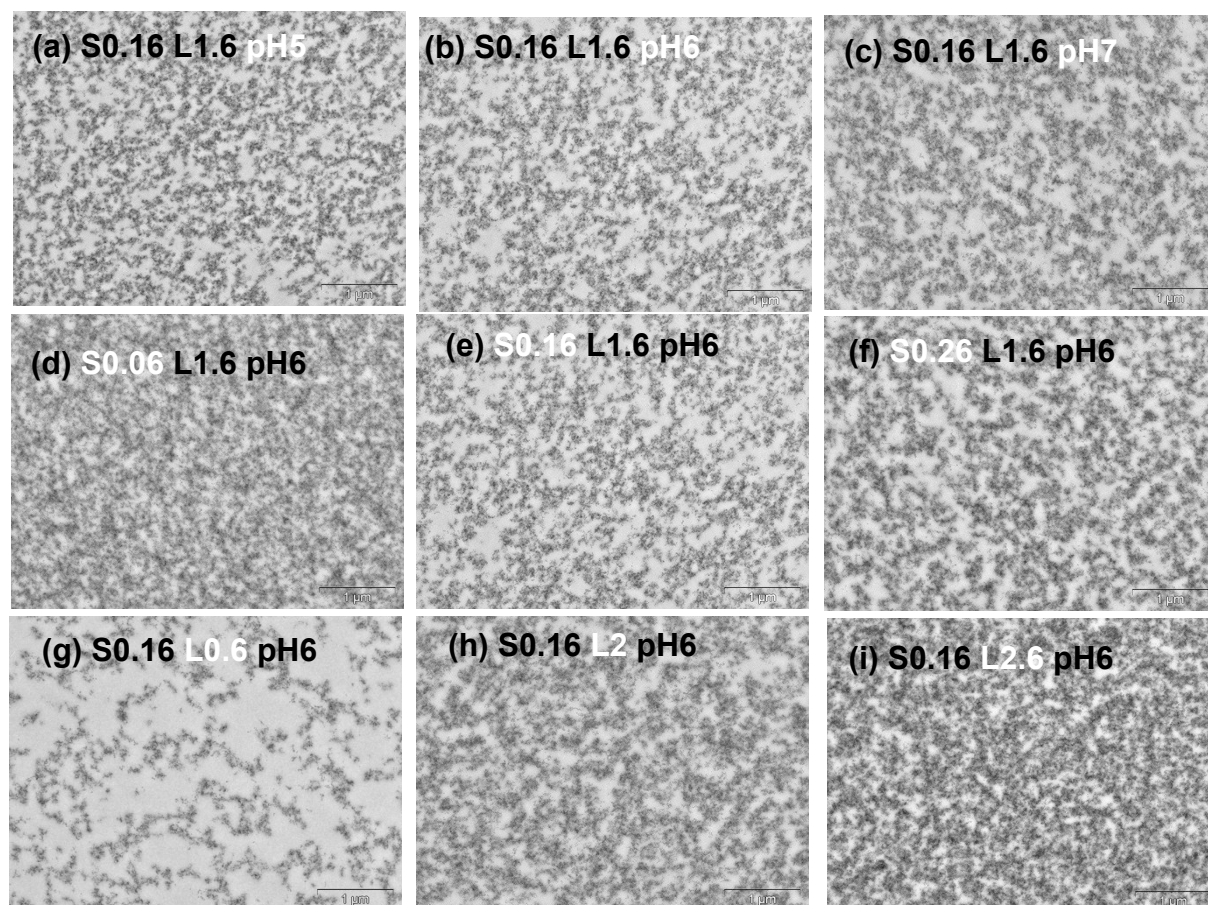

#### ESI-4 Macroscopic observations of cell suspension at various pHs

##### *Anabaena flos-aquae*

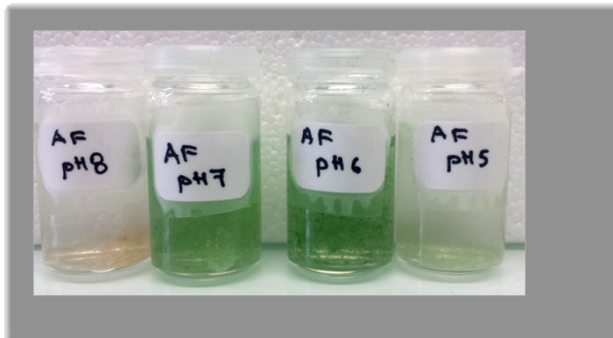

##### *Euglena gracilis*

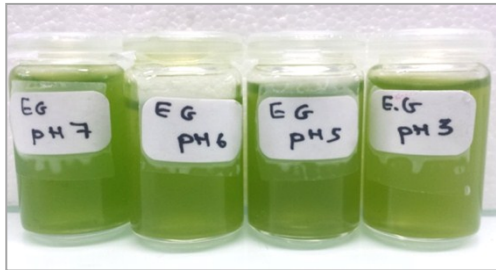

##### *Chlorella vulgaris*

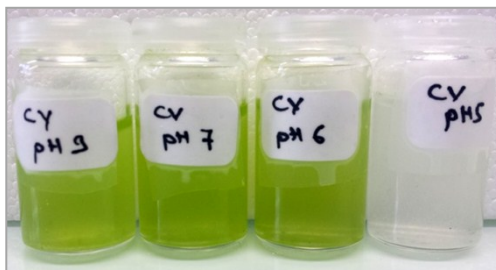

**ESI-5** TEM images of cells encapsulated in a silica gel at pH 5 ([Ludox] = 1.6 M, [silicate] = 0.16 M) and at [silicate] = 0.26 M (pH 6, [Ludox] = 1.6 M)

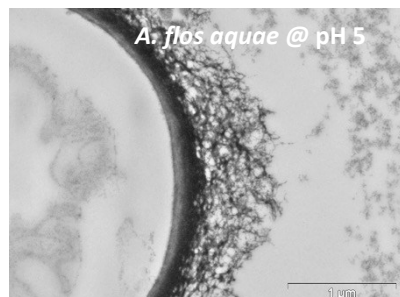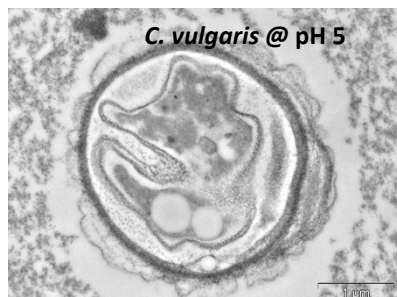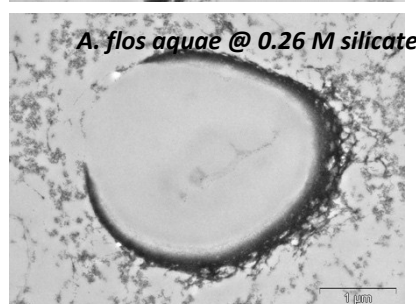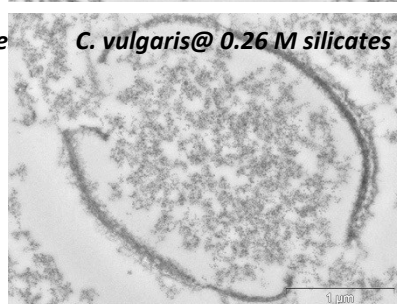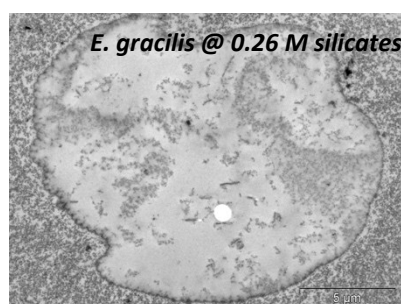

Supplement: c7tb00341b1.pdf [file c7tb00341b1.pdf]
